# Supplementary material
Source: PubMed Central journal article supplement (PMC10157271)
Supplement: mmc1.pdf [file mmc1.pdf]

**Supplemental information**

**Rapid escape of new SARS-CoV-2 Omicron variants  
from BA.2-directed antibody responses**

**Aiste Dijokaite-Guraliuc, Raksha Das, Daming Zhou, Helen M. Ginn, Chang Liu, Helen M.E. Duyvesteyn, Jiandong Huo, Rungtiwa Nutalai, Piyada Supasa, Muneeswaran Selvaraj, Thushan I. de Silva, Megan Plowright, Thomas A.H. Newman, Hailey Hornsby, Alexander J. Mentzer, Donal Skelly, Thomas G. Ritter, Nigel Temperton, Paul Klenerman, Eleanor Barnes, Susanna J. Dunachie, OPTIC consortium, Cornelius Roemer, Thomas P. Peacock, Neil G. Paterson, Mark A. Williams, David R. Hall, Elizabeth E. Fry, Juthathip Mongkolsapaya, Jingshan Ren, David I. Stuart, and Gavin R. Screaton**

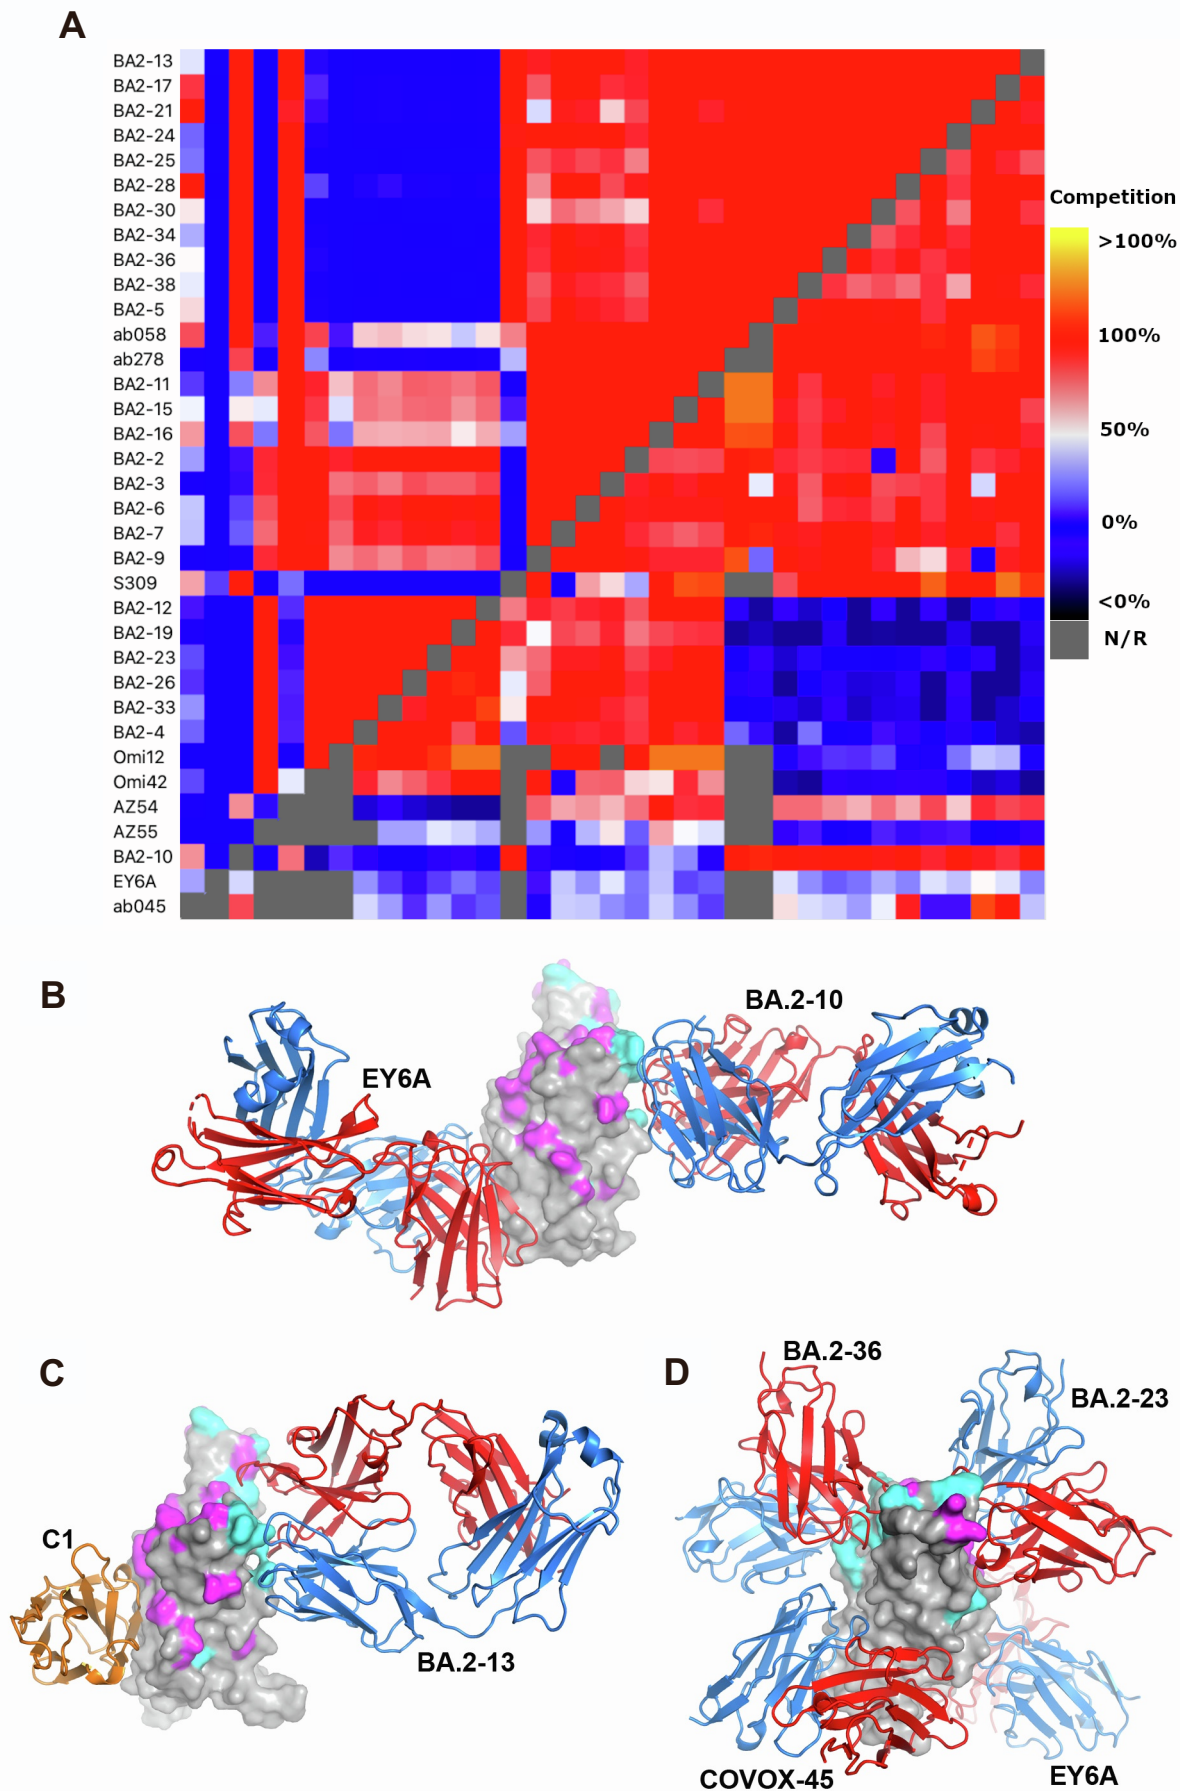

**Figure S1. Mapping of all antibodies and ternary and quintuple complex structures.** (A) Competition mapping, as measured by BLI (bottom right) and as calculated by *Mabscape* (top left). (B) Delta-RBD with BA.2-10 and EY6A Fabs. (C) Delta-RBD with BA.2-13 Fab and C1 nanobody. (D) Delta-RBD with BA.2-23, BA.2-36, EY6A and COVOX-45 Fabs. RBD is drawn as grey surface representation with BA.4 mutation sites highlighted in magenta and the additional mutation sites of all variants shown in Figure 1A are shown in cyan. Fabs are shown as ribbons with HC in red and LC in blue. The C1 nanobody in (B) is coloured in orange. Related to Figures 4,5 & 6.

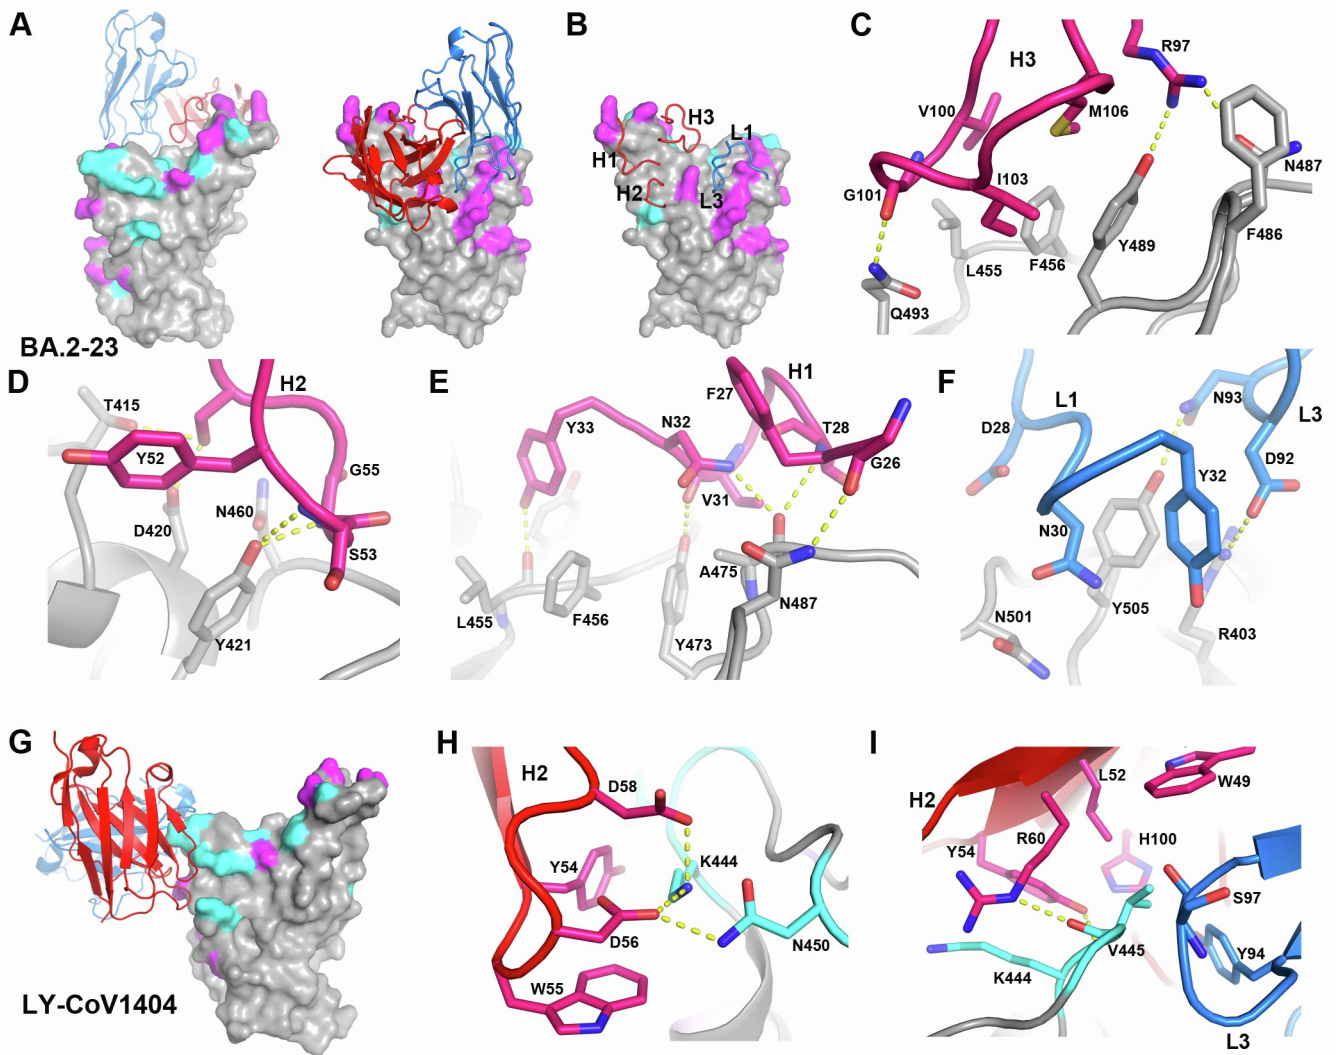

**Figure S2. Structure of Delta-RBD and BA.2-23 complex and sensitivity of LY-CoV1404 to Omicron subvariants containing K444T or V450P mutation indicated by the structure of its complex with RBD.** (A) overall structure of RBD and BA.2-23 complex. (B)-(F) details of interactions between RBD and BA.2-23. Drawing style and colour scheme are as in Figure 6. (G) Overall structure of RBD/LY-CoV1404 (PDB ID, 7MMO) as viewed from front of the RBD. The drawing style and colour scheme are as in (A). (H) Interactions of K444 of the RBD with CDR-H2 of LY-CoV1404. (I) Contacts between V445 of the RBD and LY-CoV1404. The side chains of the RBD, Fab HC and LC are shown as cyan, red and blue sticks respectively. Hydrogen bonds and salt bridges are shown as yellow broken bonds. Related to Figure 6.

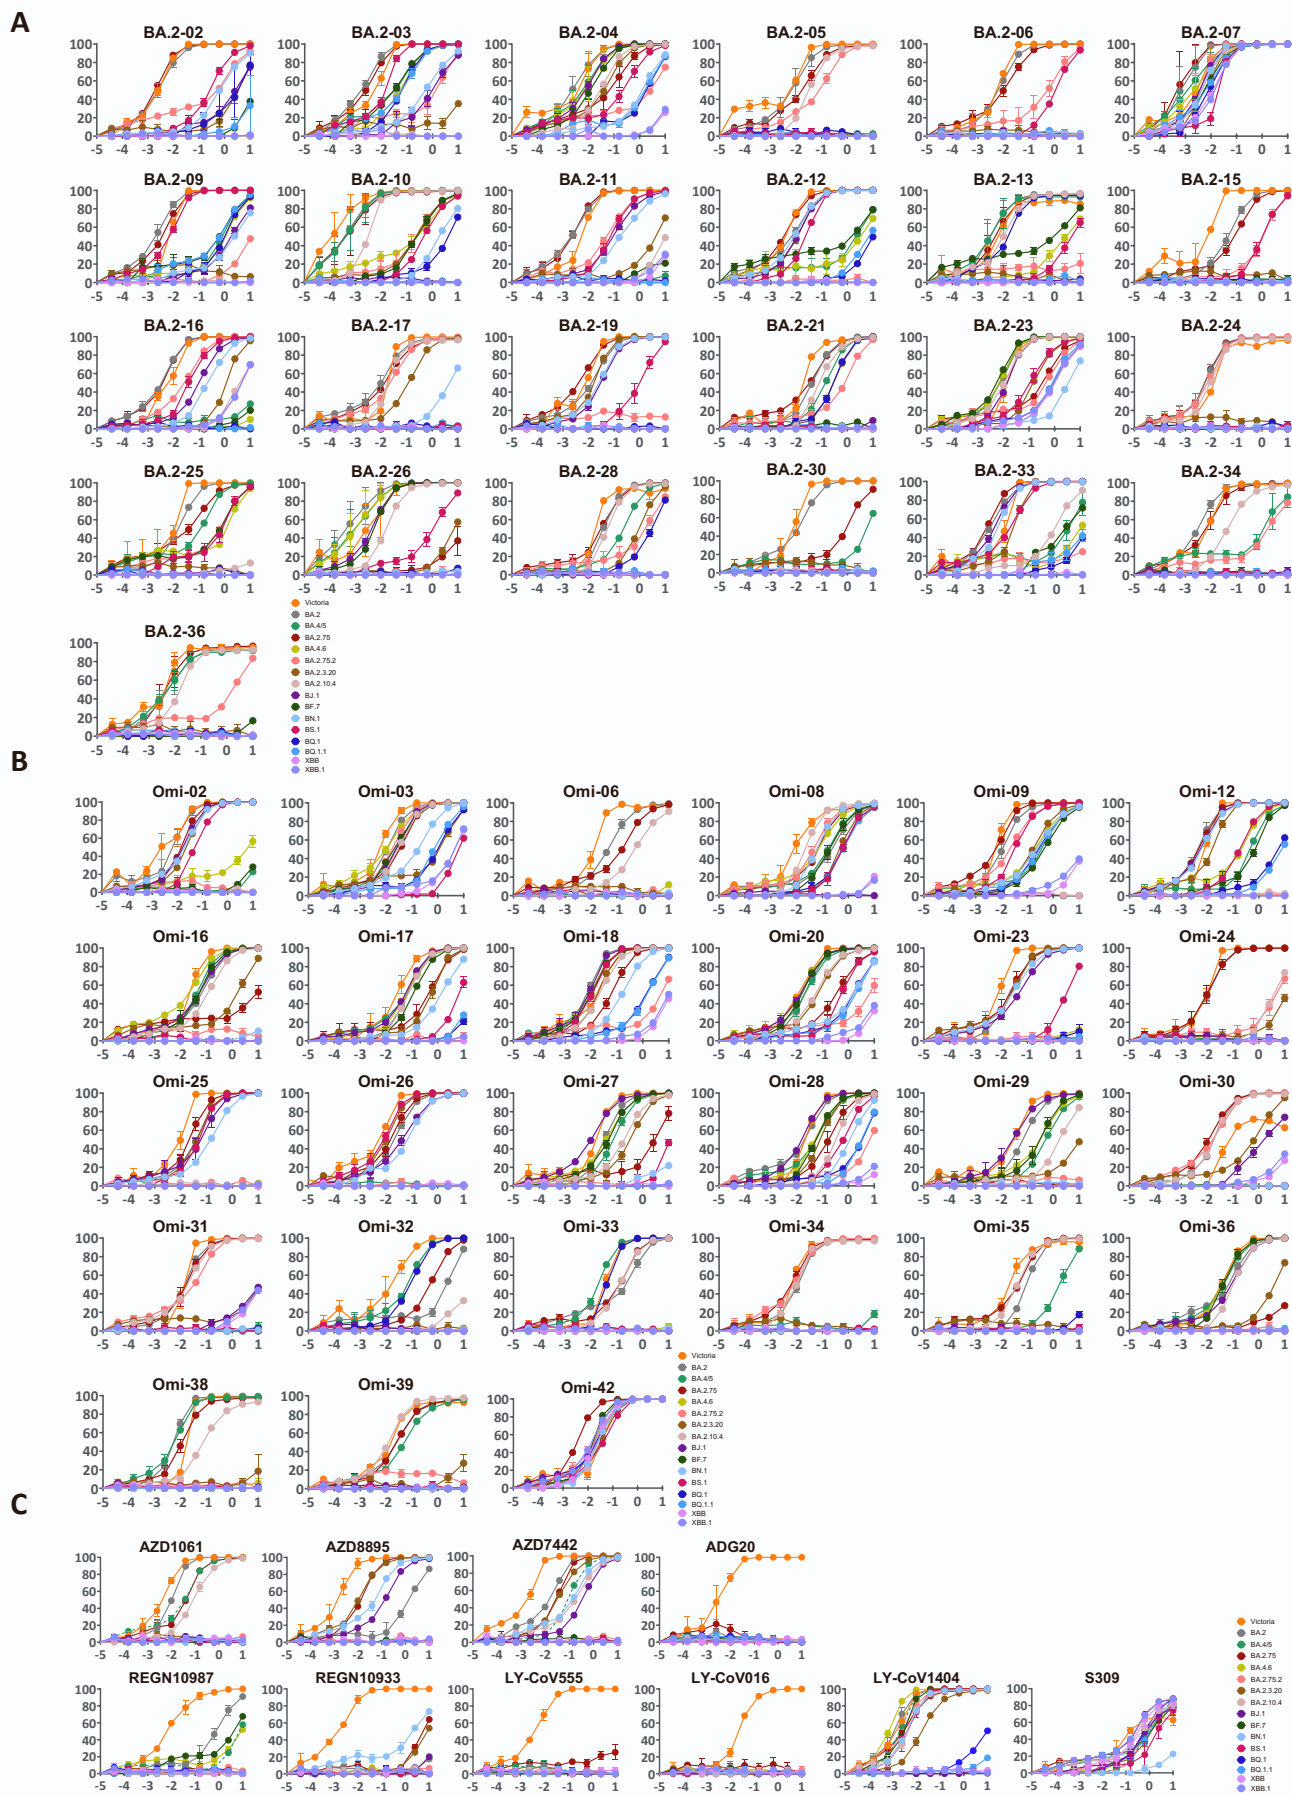

**Figure S3. Neutralization assays.** Neutralization curves using lentivirus pseudotyped with the S gene of the indicated BA.2 sub-lineages (A) BA.2 mAbs, (B) Omi-mAbs, (C) Commercial mAb. Related to Figure 3. Data for Omi-mAbs and Commercial mAbs against Victoria, BA.2, BA.2.75, BA.4/5, and BA.4.6 previously reported are included for comparison<sup>S4,S5,S6</sup>.

# Compiled IC50 titres of BA.1 mAb, data for various viruses

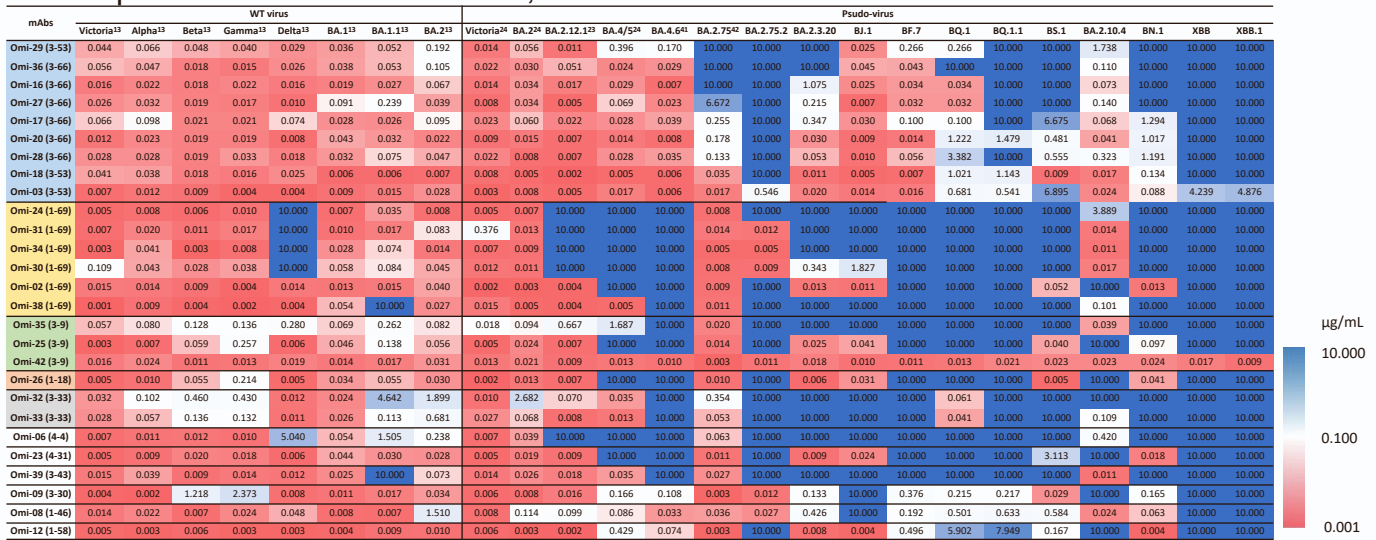

**Figure S4 Heat map of IC50 neutralization titres for the panel of BA.1 (Omi) mAb.** Pseudoviral neutralization IC50 titres for indicated mAb against a panel of pseudoviruses expressing variant S sequences. Live virus IC50 values against variants found earlier in the pandemic are included for comparison. Data for live virus assays<sup>S3</sup> and pseudoviral data for Victoria, BA.2, BA.2.12.1, BA.2.75, BA.4/5, and BA.4.6 previously reported are included for comparison<sup>S3,S4,S5,S6,S7</sup>. Related to Figure 3.

Table S1. Sources of BA.2 sub-lineage sequences, related to Figure 1.

| Lineage                    | Defining RBD mutations                                         | Example early genome | Submitting scientist, laboratory                                                                                       | Country/Region of earliest sequences | Date of earliest sequences | Pango issue, contributor |
|----------------------------|----------------------------------------------------------------|----------------------|------------------------------------------------------------------------------------------------------------------------|--------------------------------------|----------------------------|--------------------------|
| BA.4.6                     | BA.4/5 + R346T                                                 | EPI_ISL_12475182     | Oliver et al, HOSPITAL UNIVERSITARIO SON ESPASES                                                                       | Europe/South Africa                  | April 2022                 | #741, ryhisner           |
| BA.4.7                     | BA.4/5 + R346S                                                 | EPI_ISL_12644817     | Iranzadeh et al. NHL/UCT                                                                                               | South Africa/Israel                  | April 2022                 | #777, FedeGueli          |
| BF.7(BA.5.2.1.7)           | BA.4/5 R346T                                                   | EPI_ISL_12810243     | Coppens et al., Labo Klinische Biologie, UZA                                                                           | Belgium                              | May 2022                   | #827, ryhisner           |
| BQ.1(BA.5.3.1.1.1.1.1)     | BA.4/5 K444T, N460K                                            | EPI_ISL_14294806     | Howard et al., Centers for Disease Control and Prevention Division of Viral Diseases, Pathogen Discovery               | Nigeria                              | July 2022                  | #993, FedeGueli          |
| BQ.1.1(BA.5.3.1.1.1.1.1.1) | BQ.1 + R346T                                                   | EPI_ISL_14752457     | Christensen et al., Houston Methodist Hospital                                                                         | USA                                  | August 2022                | #993, FedeGueli          |
| BA.2.75                    | BA.2 + G339H, G446S, N460K, R493Q*                             | EPI_ISL_13302209     | Khairnar et al. CSIR-NEERI, Nagpur Covid-19 Testing Lab                                                                | India                                | April 2022                 | #773, Silcn              |
| BA.2.75.2                  | BA.2.75 + R346T, F486S                                         | EPI_ISL_14290506     | Gupta et al. ILBS/INSACOG                                                                                              | India                                | July 2022                  | #966, agamedilab         |
| BN.1(BA.2.75.5.1)          | BA.2.75 + R346T, K356T, F490S                                  | EPI_ISL_14601644     | Sima et al, Lifebrain Covid Labor GmbH                                                                                 | India                                | July 2022                  | #994, corneliusroemer    |
| BJ.1(BA.2.10.1.1)          | BA.2 + G339H, R346T, L368I, V445P, G446S, V483A, F490V         | EPI_ISL_14166909     | Maitra et al. National Institute of Biomedical Genomics – INSACOG                                                      | India                                | June 2022                  | #915, Silcn              |
| BA.2.10.4                  | BA.2 + G446S, F486P, R493Q*, S494P                             | EPI_ISL_13929780     | Karyakarte et al. Center for Genomics, Department of Microbiology, BJ Government Medical College and Sassoon Hospitals | India                                | June 2022                  | #898, Silcn              |
| BS.1(BA.2.3.2.1)           | BA.2 + R346T, L452R, N460K, G476S                              | EPI_ISL_14853710     | Sekizuka et al. Pathogen Genomics Center, National Institute of Infectious Diseases                                    | Japan ex Vietnam                     | August 2022                | #1052, TakaKen6          |
| BA.2.3.20                  | K444R, N450D, L452M, N460K, E484R, R493Q*                      | EPI_ISL_14723265     | Selway et al, SA Pathology                                                                                             | USA/Singapore/Australia              | August 2022                | #1013, ryhisner          |
| XBB                        | BA.2 + R346T, L368I, V445P, G446S, N460K, F486S, F490S, R493Q* | EPI_ISL_14917761     | Ngan et al, National Public Health Laboratory, National Centre for Infectious Diseases                                 | India                                | August 2022                | #1058, corneliusroemer   |

Table S2. Variable gene usage BA.2 antibodies, related to Figure 1.

| Ab id.  | Protein-Specific | Heavy Chain               |                   |                   |                           |             | Light Chain |                          |                     |                           |             |
|---------|------------------|---------------------------|-------------------|-------------------|---------------------------|-------------|-------------|--------------------------|---------------------|---------------------------|-------------|
|         |                  | V-GENE and allele         | J-GENE and allele | D-GENE and allele | V-REGION Nb of AA changes | CDR3 length | Light Chain | V-GENE and allele        | J-GENE and allele   | V-REGION Nb of AA changes | CDR3 length |
| BA.2-02 | RBD              | 1-69*01 F, or 1-69D*01 F  | 5*02 F            | 3-22*01 F         | 10                        | 19          | K           | 1-39*01 F, or 1D-39*01 F | 4*01 F              | 7                         | 9           |
| BA.2-03 | RBD              | 1-2*02 F                  | 6*02 F            | 3-16*02 F         | 10                        | 23          | K           | 3-11*01 F                | 5*01 F              | 6                         | 9           |
| BA.2-04 | RBD              | 3-53*02 F                 | 6*02 F            | 3-9*01 F          | 11                        | 11          | K           | 1-9*01 F                 | 5*01 F              | 8                         | 10          |
| BA.2-05 | RBD              | 1-69*06 F, or 1-69*17 F   | 6*02 F            | 3-3*02 F          | 9                         | 17          | λ           | 1-47*01 F                | 3*02 F              | 10                        | 11          |
| BA.2-06 | RBD              | 1-69*01 F, or 1-69D*01 F  | 4*02 F            | 3-22*01 F         | 8                         | 20          | K           | 1-39*01 F, or 1D-39*01 F | 1*01 F              | 4                         | 9           |
| BA.2-07 | RBD              | 1-69*01 F, or 1-69D*01 F  | 5*02 F            | 3-22*01 F         | 13                        | 19          | K           | 1-39*01 F, or 1D-39*01 F | 4*01 F              | 8                         | 9           |
| BA.2-09 | RBD              | 1-2*02 F                  | 6*02 F            | 3-16*02 F         | 11                        | 23          | K           | 3-11*01 F                | 5*01 F              | 8                         | 9           |
| BA.2-10 | RBD              | 3-9*01 F                  | 3*02 F            | 3-22*01 F         | 7                         | 18          | K           | 1-39*01 F, or 1D-39*01 F | 3*01 F              | 8                         | 9           |
| BA.2-11 | RBD              | 1-69*01 F, or 1-69D*01 F  | 5*02 F            | 3-22*01 F         | 9                         | 19          | K           | 1-39*01 F, or 1D-39*01 F | 4*01 F              | 5                         | 9           |
| BA.2-12 | RBD              | 3-9*01 F                  | 6*02 F            | 2-21*02 F         | 8                         | 16          | K           | 1-39*01 F, or 1D-39*01 F | 2*01 F              | 13                        | 9           |
| BA.2-13 | RBD              | 3-15*01 F                 | 3*01 F            | 3-10*01 F         | 9                         | 17          | K           | 1-39*01 F, or 1D-39*01 F | 4*01 F              | 4                         | 8           |
| BA.2-15 | RBD              | 1-69*01 F, or 1-69D*01 F  | 4*02 F            | 3-22*01 F         | 10                        | 20          | K           | 1-39*01 F, or 1D-39*01 F | 1*01 F              | 3                         | 9           |
| BA.2-16 | RBD              | 1-69*01 F, or 1-69D*01 F  | 5*02 F            | 3-22*01 F         | 9                         | 19          | K           | 1-39*01 F, or 1D-39*01 F | 4*01 F              | 7                         | 9           |
| BA.2-17 | RBD              | 1-69*06 F                 | 6*02 F            | 3-3*01 F          | 9                         | 19          | λ           | 2-14*01 F                | 2*01 F, or 3*01 F   | 8                         | 11          |
| BA.2-19 | RBD              | 3-48*03 F                 | 4*02 F            | 1-26*01 F         | 8                         | 13          | K           | 1-5*03 F                 | 1*01 F              | 6                         | 10          |
| BA.2-21 | RBD              | 3-9*01 F                  | 4*02 F            | 5-24*01 ORF       | 11                        | 16          | λ           | 1-40*01 F                | 3*02 F              | 7                         | 11          |
| BA.2-23 | RBD              | 3-53*04 F                 | 6*02 F            | 1-26*01 F         | 12                        | 13          | K           | 1-33*01 F, or 1D-33*01 F | 5*01 F              | 8                         | 9           |
| BA.2-24 | RBD              | 1-69*09 F                 | 4*02 F            | 3-22*01 F         | 13                        | 16          | K           | 1-39*01 F, or 1D-39*01 F | 5*01 F              | 6                         | 9           |
| BA.2-25 | RBD              | 4-59*01 F                 | 4*02 F            | 5-12*01 F         | 16                        | 16          | K           | 2-28*01 F, or 2D-28*01 F | 3*01 F              | 7                         | 9           |
| BA.2-26 | RBD              | 3-66*01 F, or 3-66*04 F   | 5*01 F, or 5*02 F | 2-15*01 F         | 16                        | 10          | K           | 1-33*01 F, or 1D-33*01 F | 4*02 (F)            | 10                        | 8           |
| BA.2-28 | RBD              | 3-9*01 F                  | 6*02 F            | 6-6*01 F          | 14                        | 19          | λ           | 3-21*02 F                | 2*01 F, or 3*01 F   | 6                         | 11          |
| BA.2-30 | RBD              | 4-59*03 F                 | 4*02 F            | 5-12*01 F         | 13                        | 16          | K           | 2-28*01 F, or 2D-28*01 F | 3*01 F              | 6                         | 9           |
| BA.2-33 | RBD              | 4-61*11 (F)               | 5*02 F            | 2-15*01 F         | 16                        | 14          | λ           | 1-47*01 F                | 2*01 F, or 3*01 F   | 13                        | 11          |
| BA.2-34 | RBD              | 1-69*09 F                 | 4*02 F            | 2-21*02 F         | 11                        | 12          | K           | 1-5*01 F                 | 1*01 F              | 4                         | 8           |
| BA.2-36 | RBD              | 4-61*02 F, or 4-61*11 (F) | 4*02 F            | 6-25*01 F         | 17                        | 11          | K           | 1-5*01 F                 | 1*01 F, or 4*02 (F) | 7                         | 8           |

Table S3. Structural data collection, analysis and model statistics, related to Figure 6.

| Method                                              | X-ray Crystallography                                              |                                                                    |                        | Cryo-EM                                       |         |
|-----------------------------------------------------|--------------------------------------------------------------------|--------------------------------------------------------------------|------------------------|-----------------------------------------------|---------|
| Structure                                           | Delta-RBD/BA.2-10/EY6A                                             | Delta-RBD/BA.2-13/C1                                               | Delta-RBD/BA.2-36      | Delta-RBD/BA.2-23/BA.2-36/EY6A/Fab-45         |         |
| PDB/EMBD ID                                         | 8BBN                                                               | 8C3V                                                               | 8BBO                   | 8BCZ, EMD-15971                               |         |
| <b>Data collection</b>                              |                                                                    |                                                                    |                        |                                               |         |
| Space group                                         | <i>P2</i> <sub>1</sub> <i>2</i> <sub>1</sub> <i>2</i> <sub>1</sub> | <i>P2</i> <sub>1</sub> <i>2</i> <sub>1</sub> <i>2</i> <sub>1</sub> | <i>P4</i> <sub>1</sub> | Voltage (kV)                                  | 300     |
| Cell dimensions                                     |                                                                    |                                                                    |                        | Frames (EER fractions)                        | 50      |
| <i>a</i> , <i>b</i> , <i>c</i> (Å)                  | 170.7, 171.7, 177.0                                                | 105.9, 160.8, 172.4                                                | 99.2, 99.2, 86.1       | Dose rate (e <sup>-</sup> /Å <sup>2</sup> /s) | 11.5    |
| $\alpha$ , $\beta$ , $\gamma$ (°)                   | 90, 90, 90                                                         | 90, 90, 90                                                         | 90, 90, 90             | Total dose (e <sup>-</sup> /Å <sup>2</sup> )  | 50      |
| Resolution (Å)                                      | 56–3.58 (3.65–3.58) <sup>a</sup>                                   | 80–2.74 (2.79–2.74)                                                | 54–2.75 (2.80–2.75)    | Calibrated pixel size (Å <sup>2</sup> )       | 0.7303  |
| <i>R</i> <sub>merge</sub>                           | 0.467 (---)                                                        | 0.257                                                              | 0.460 (---)            | Defocus (μm)                                  | 0.8-2.6 |
| <i>R</i> <sub>pin</sub>                             | 0.130 (1.771)                                                      | 0.072 (1.078)                                                      | 0.90 (2.066)           |                                               |         |
| <i>I</i> / <i>s(I)</i>                              | 4.1 (0.3)                                                          | 7.4 (0.4)                                                          | 7.5 (0.4)              | Movies                                        | 20,535  |
| <i>CC</i> <sub>1/2</sub>                            | 0.992 (0.301)                                                      | 0.995 (0.317)                                                      | 0.994 (0.390)          | Particles (final)                             | 167,492 |
| Completeness (%)                                    | 100 (97.2)                                                         | 100 (99.5)                                                         | 100 (99.9)             | Map resolution (Å)                            | 2.9     |
| Redundancy                                          | 13.8 (13.2)                                                        | 13.7 (14.1)                                                        | 26.8 (18.3)            | Sharpening B-factor (Å <sup>2</sup> )         | 90.5    |
| <b>Refinement</b>                                   |                                                                    |                                                                    |                        |                                               |         |
| Resolution (Å)                                      | 56–3.58                                                            | 67–2.74                                                            | 50–2.75                | Resolution (Å)                                | 2.9     |
| No. reflections                                     | 52453/2840                                                         | 73940/3933                                                         | 20668/1102             | No. protein atoms                             | 8505    |
| <i>R</i> <sub>work</sub> / <i>R</i> <sub>free</sub> | 0.265/0.313                                                        | 0.216/0.259                                                        | 0.224/0.252            | <i>B</i> factors (Å <sup>2</sup> )            | 62      |
| No. atoms                                           |                                                                    |                                                                    |                        | r.m.s. deviations                             |         |
| Protein                                             | 24354                                                              | 17512                                                              | 4738                   | Bond lengths (Å)                              | 0.003   |
| Ligand/ion/water                                    |                                                                    | 285                                                                | 14                     | Bond angles (°)                               | 0.5     |
| <i>B</i> factors (Å <sup>2</sup> )                  |                                                                    |                                                                    |                        | Clash score                                   | 6.2     |
| Protein                                             | 174                                                                | 93                                                                 | 81                     | Ramachandran outlier (%)                      | 0       |
| Ligand/ion/water                                    |                                                                    | 101                                                                | 126                    | Rotamer outlier (%)                           | 1.2     |
| r.m.s. deviations                                   |                                                                    |                                                                    |                        | d FSC model (0.5)                             | 3.1     |
| Bond lengths (Å)                                    | 0.002                                                              | 0.003                                                              | 0.002                  | CC (mask)                                     | 0.83    |
| Bond angles (°)                                     | 0.5                                                                | 0.6                                                                | 0.5                    |                                               |         |



Table S4. Sample information, related to Star Methods.

|                | BA.1 infection   | BA.2 infection   | BA.4/5 infection | BNT162b2 V3+28   |  |
|----------------|------------------|------------------|------------------|------------------|--|
| Participants   |                  |                  |                  |                  |  |
| Female         | 6                | 19               | 6                | 8                |  |
| Male           | 3                | 4                | 5                | 10               |  |
| Median Age (Y) | 31 (Range 21-55) | 41 (Range 22-57) | 42 (Range 20-94) | 45 (Range 30-59) |  |
|                |                  |                  |                  |                  |  |

## Supplemental References

S1. Dejnirattisai, W., Zhou, D., Ginn, H.M., Duyvesteyn, H.M.E., Supasa, P., Case, J.B., Zhao, Y., Walter, T.S., Mentzer, A.J., Liu, C., et al. (2021). The antigenic anatomy of SARS-CoV-2 receptor binding domain. *Cell* 184, 2183-2200.

S2. Liu, C., Zhou, D., Nutalai, R., Duyvestyn, H., Tuekprakhon, A., Ginn, H., Dejnirattisai, W., Supasa, P., Mentzer, A., Wang, B., et al. (2021). The Beta mAb response underscores the antigenic distance to other SARS-CoV-2 variants. *Cell, Host and Microbe* 30, 53-68.

S3. Nutalai, R., Zhou, D., Tuekprakhon, A., Ginn, H., Supasa, P., Liu, C., Huo, J., Mentzer, A., Duyvesteyn, H.M.E., Dijokaite-Guraliuc, A., et al. (2022). Potent cross-reactive antibodies following Omicron breakthrough in vaccinees. *Cell* 185, 2116-2131.

S4. Tuekprakhon, A., Nutalai, R., Dijokaite-Guraliuc, A., Zhou, D., Ginn, H.M., Selvaraj, M., Liu, C., Mentzer, A.J., Supasa, P., Duyvesteyn, H.M.E., et al. (2022). Antibody escape of SARS-CoV-2 Omicron BA.4 and BA.5 from vaccine and BA.1 serum. *Cell* 185, 2422-2433 e2413. 10.1016/j.cell.2022.06.005.

S5. Dijokaite-Guraliuc, A., Das, R., Nutalai, R., Zhou, D., Mentzer, A.J., Liu, C., Supasa, P., Dunachie, S.J., Lambe, T., Fry, E.E., et al. (2022). Antigenic characterization of SARSCoV-2 Omicron subvariant BA.4.6. *Cell Discov* 8, 127. 10.1038/s41421-022-00493-0.

S6. Huo, J., Dijokaite-Guraliuc, A., Liu, C., Zhou, D., Ginn, H.M., Das, R., Supasa, P., Selvaraj, M., Nutalai, R., Tuekprakhon, A., et al. (2023). A delicate balance between antibody evasion and ACE2 affinity for Omicron BA.2.75. *Cell Rep* 42, 111903. 10.1016/j.celrep.2022.111903.

S7. Huo, J., Dijokaite-Guraliuc, A., Nutalai, R., Das, R., Zhou, D., Mentzer, A., Fry, E., Mongkolsapaya, J., Ren, J., Stuart, D., and Screaton, G. (2022). Humoral responses against SARS-CoV-2 Omicron BA.2.11, BA.2.12.1 and BA.2.13 from vaccine and BA.1 serum. *Cell Discovery*.
